# Supplementary material
Source: MDPI journal article supplement (https://www.mdpi.com/1422-8599/2018/3/1002)
Supplement: s1 [file s1]

## **Supplementary file**

### **2-(2-methyl-5-phenyl-1-(3,4,5-trimethoxyphenyl)-1H-pyrrol-3-yl)-2-oxo-N-(pyridin-4-yl) acetamide**

**Ebrahim Saeedian Moghadam, Mohsen Amini\***

**Department of Medicinal Chemistry, Faculty of Pharmacy and Drug Design & development Research Center, Tehran University of Medical Sciences, Tehran, Iran**

**\*Correspondence: [moamini@sina.tums.ac.ir](mailto:moamini@sina.tums.ac.ir)**

Figure.S1: <sup>1</sup>HNMR Spectrum of compound (4)

Figure.S2: <sup>1</sup>HNMR Spectrum of compound (4) - Expanded

Figure.S3: <sup>13</sup>CNMR Spectrum of compound (4)

Figure.S4: <sup>13</sup>CNMR Spectrum of compound (4) - Expanded

Figure.S5: IR Spectrum of compound (4)

Figure.S6: Mass Spectrum of compound (4)

Figure.S7: <sup>1</sup>HNMR Spectrum of compound (3)

Figure.S8: <sup>1</sup>HNMR Spectrum of compound (3) - Expanded

Figure.S9: <sup>13</sup>CNMR Spectrum of compound (3)

Figure.S10: <sup>13</sup>CNMR Spectrum of compound (3) - Expanded

Figure.S11: Mass Spectrum of compound (3)

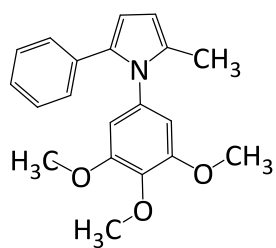

**Structure of Compound 3**

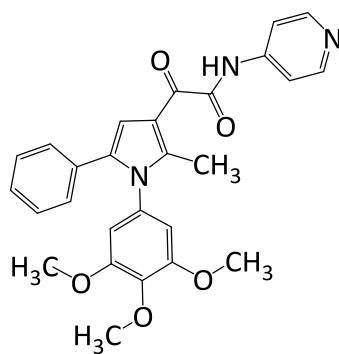

**Structure of Compound 4**

Mr. Saiedian  
511

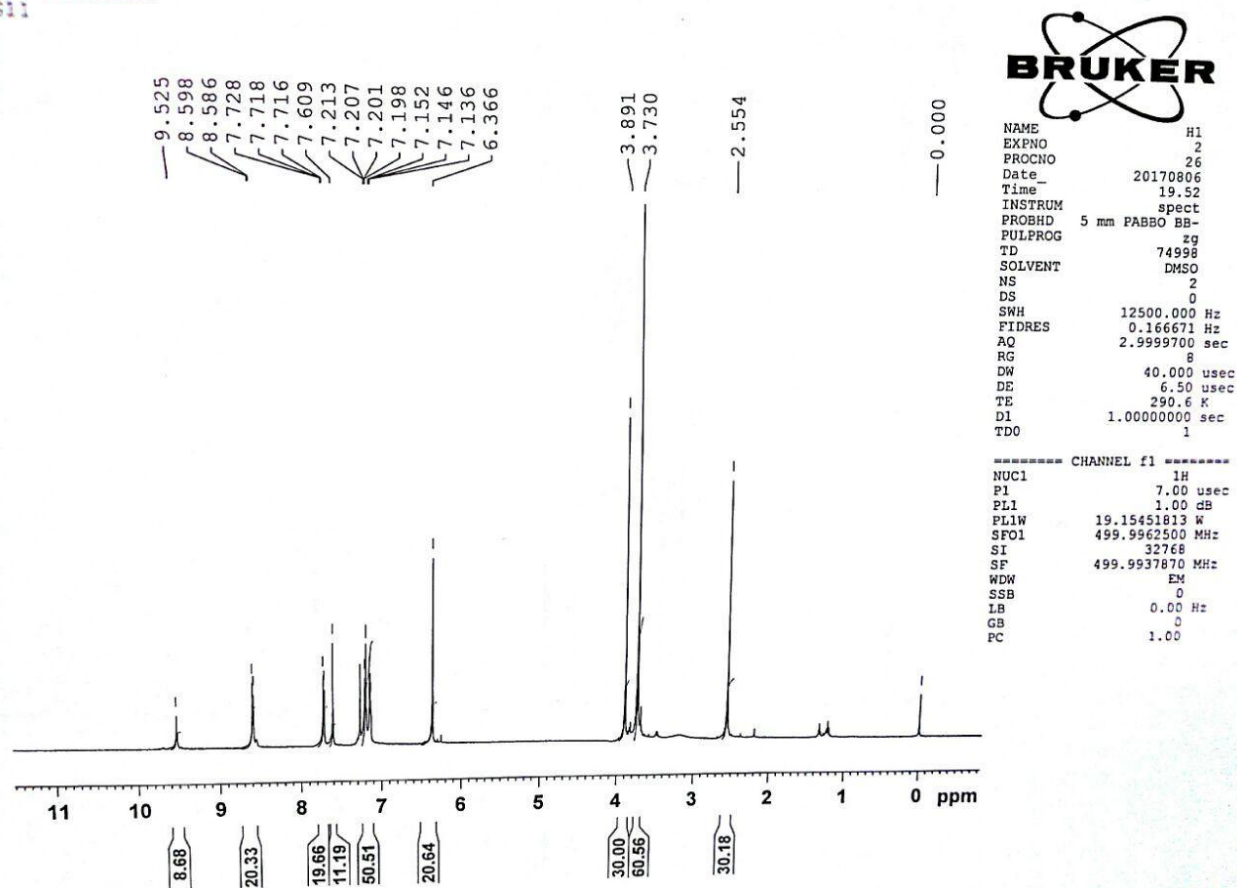

Figure.S1 -  $^1\text{H}$ NMR spectrum of 2-(2-methyl-5-phenyl-1-(3,4,5-trimethoxyphenyl)-1H-pyrrol-3-yl)-2-oxo-N-(pyridin-4-yl) acetamide. **Compound (4)**

Nr. Saiedian  
Cl:

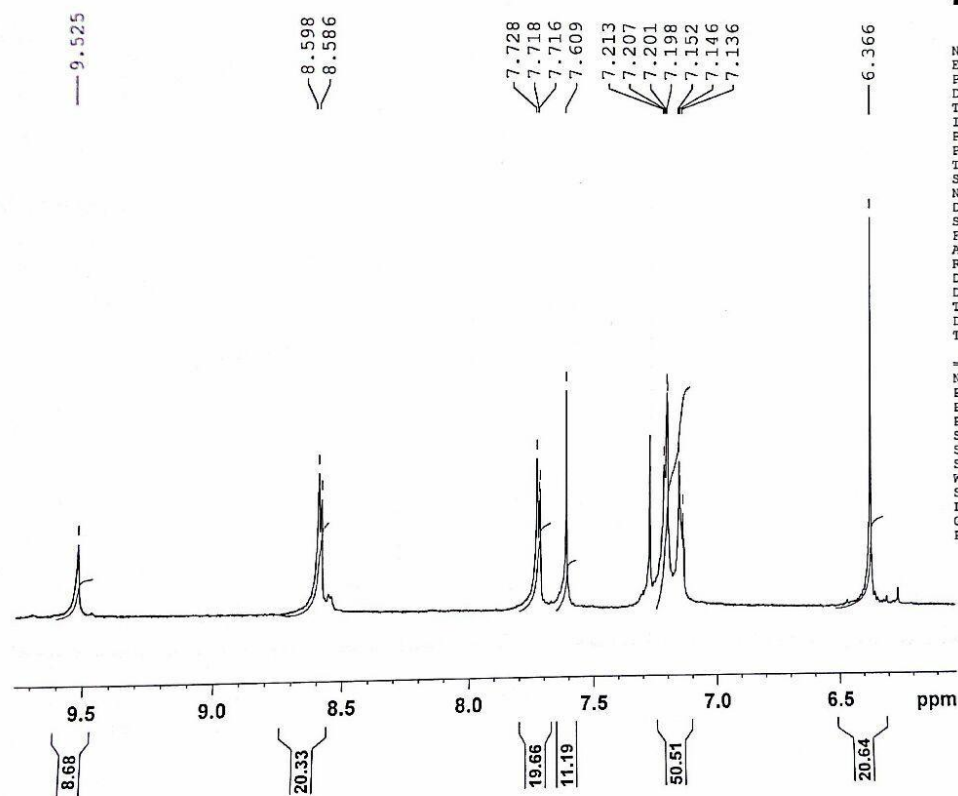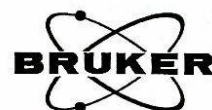

NAME H1  
EXPNO 2  
PROCNO 26  
Date 20170806  
Time 19.52  
INSTRUM spect  
PROBHD 5 mm PABBO BB-  
PULPROG zg  
TD 74998  
SOLVENT DMSO  
NS 2  
DS 0  
SWH 12500.000 Hz  
FIDRES 0.166671 Hz  
AQ 2.9999700 sec  
RG 8  
DW 40.000 usec  
DE 6.50 usec  
TE 290.6 K  
D1 1.00000000 sec  
TD0 1

===== CHANNEL f1 =====  
NUC1 1H  
P1 7.00 usec  
PL1 1.00 dB  
PL1W 19.15451813 W  
SFO1 499.9962500 MHz  
SI 32768  
SF 499.9937870 MHz  
WDW EM  
SSB 0  
LB 0.00 Hz  
GB 0  
PC 1.00

Figure.S2  $^1\text{H}$ NMR spectrum of 2-(2-methyl-5-phenyl-1-(3,4,5-trimethoxyphenyl)-1H-pyrrol-3-yl)-2-oxo-N-(pyridin-4-yl) acetamide –Expanded. **Compound (4)**

Mr. Saedian  
C11

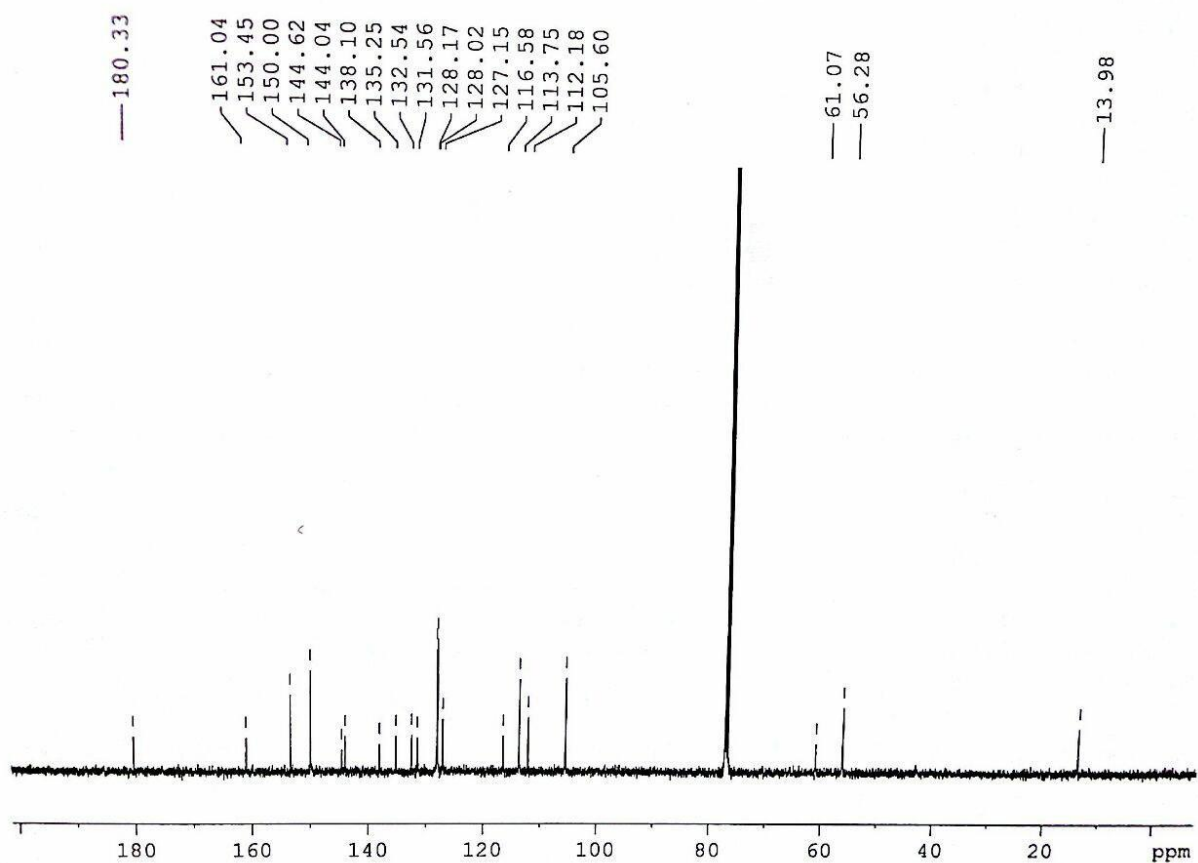

Figure.S3  $^{13}\text{C}$  NMR spectrum of 2-(2-methyl-5-phenyl-1-(3,4,5-trimethoxyphenyl)-1H-pyrrol-3-yl)-2-oxo-N-(pyridin-4-yl) acetamide. **Compound (4)**

Mr. Saeedian  
G11

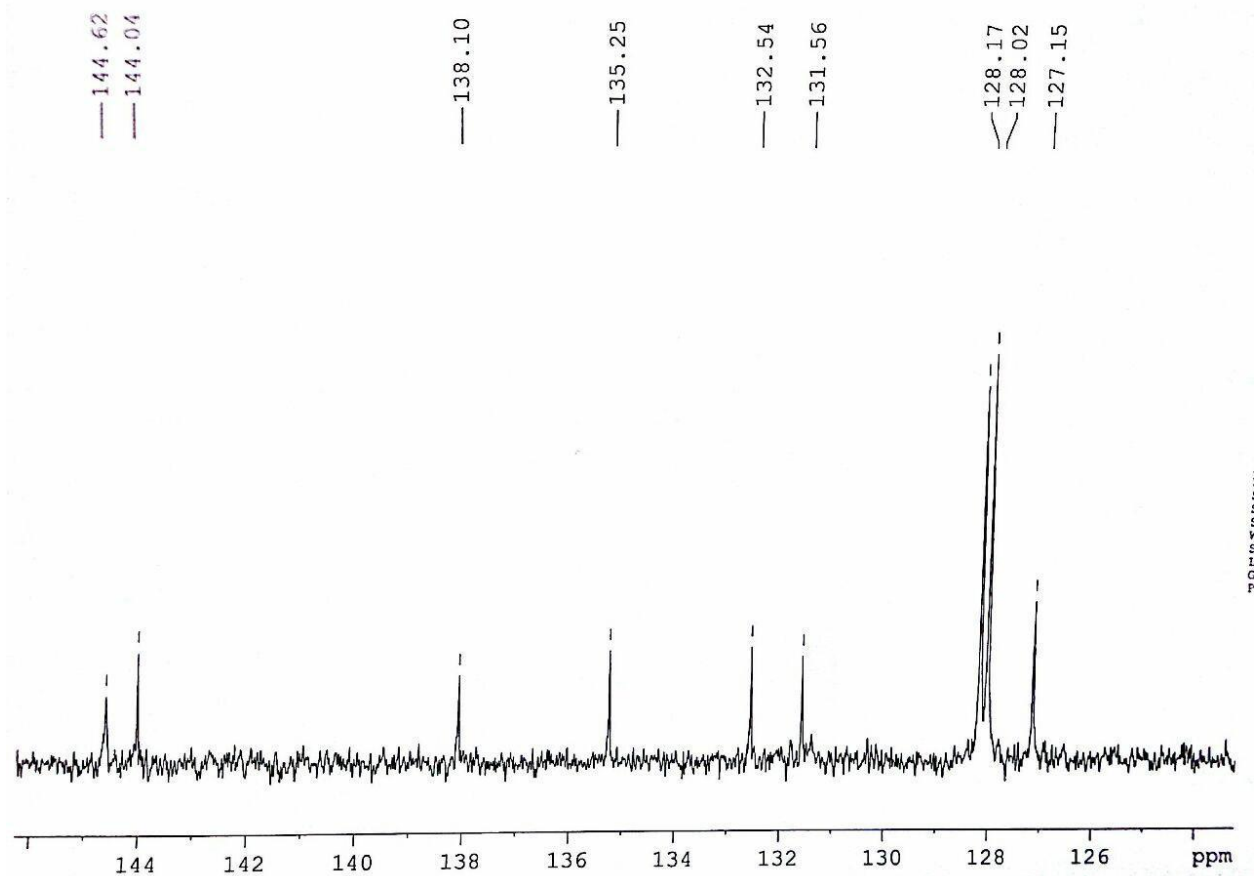

Figure.S4  $^{13}\text{C}$ NMR spectrum of 2-(2-methyl-5-phenyl-1-(3,4,5-trimethoxyphenyl)-1H-pyrrol-3-yl)-2-oxo-N-(pyridin-4-yl) acetamide – Expanded. **Compound (4)**

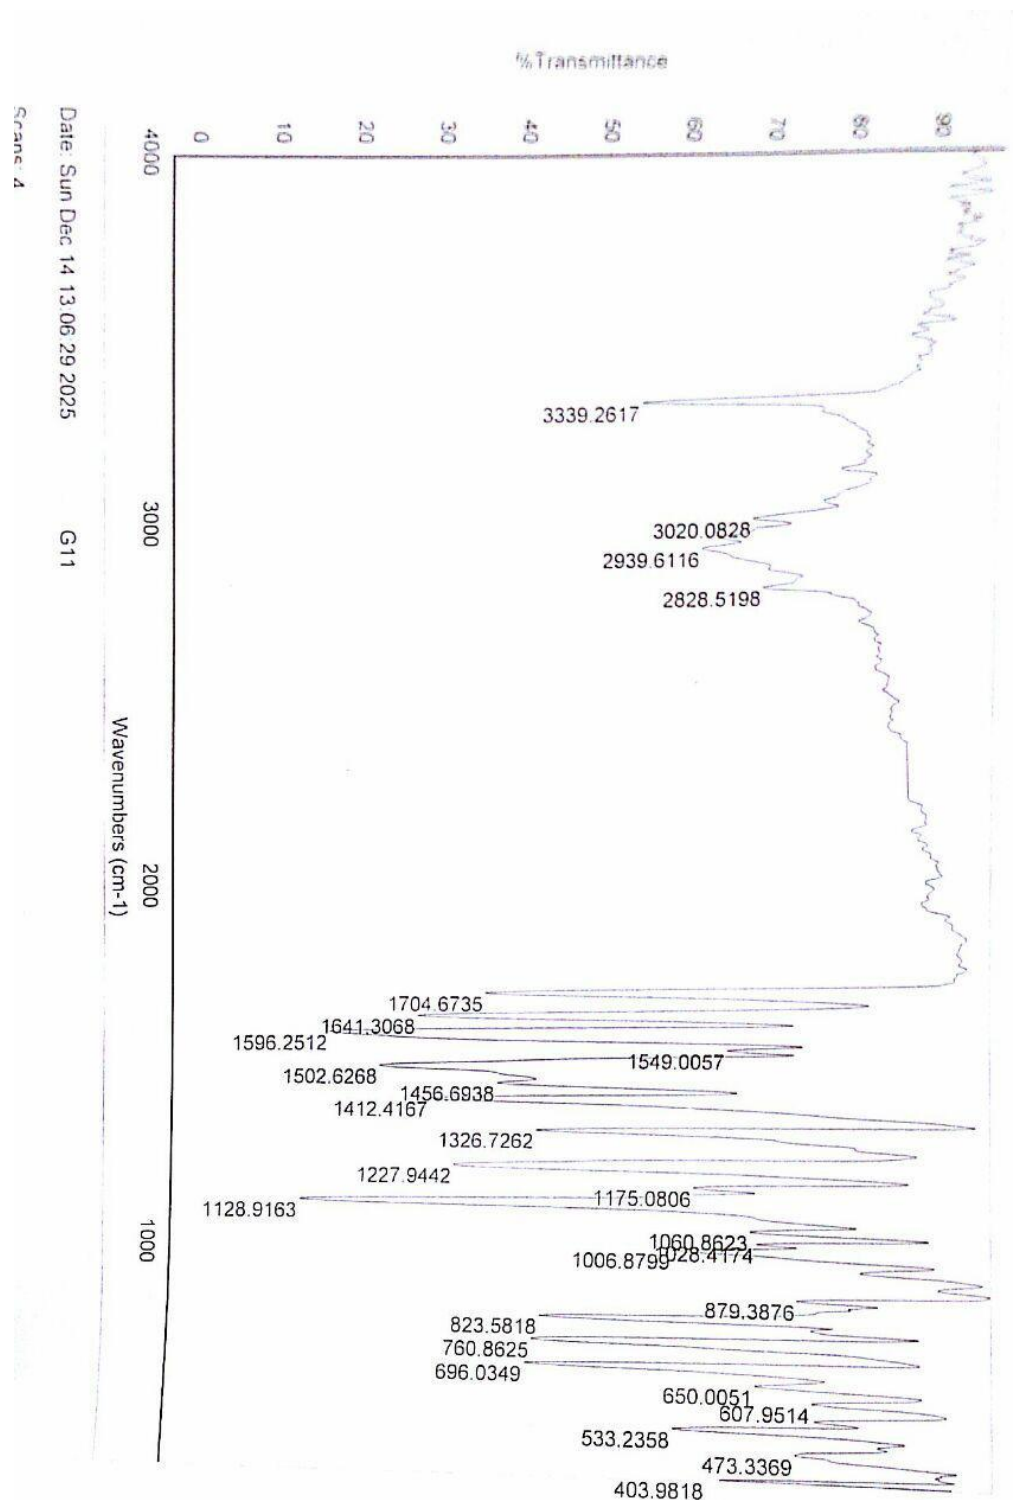

Figure.S5 -IR spectrum of 2-(2-methyl-5-phenyl-1-(3,4,5-trimethoxyphenyl)-1H-pyrrol-3-yl)-2-oxo-N-(pyridin-4-yl) acetamide. **Compound (4)**

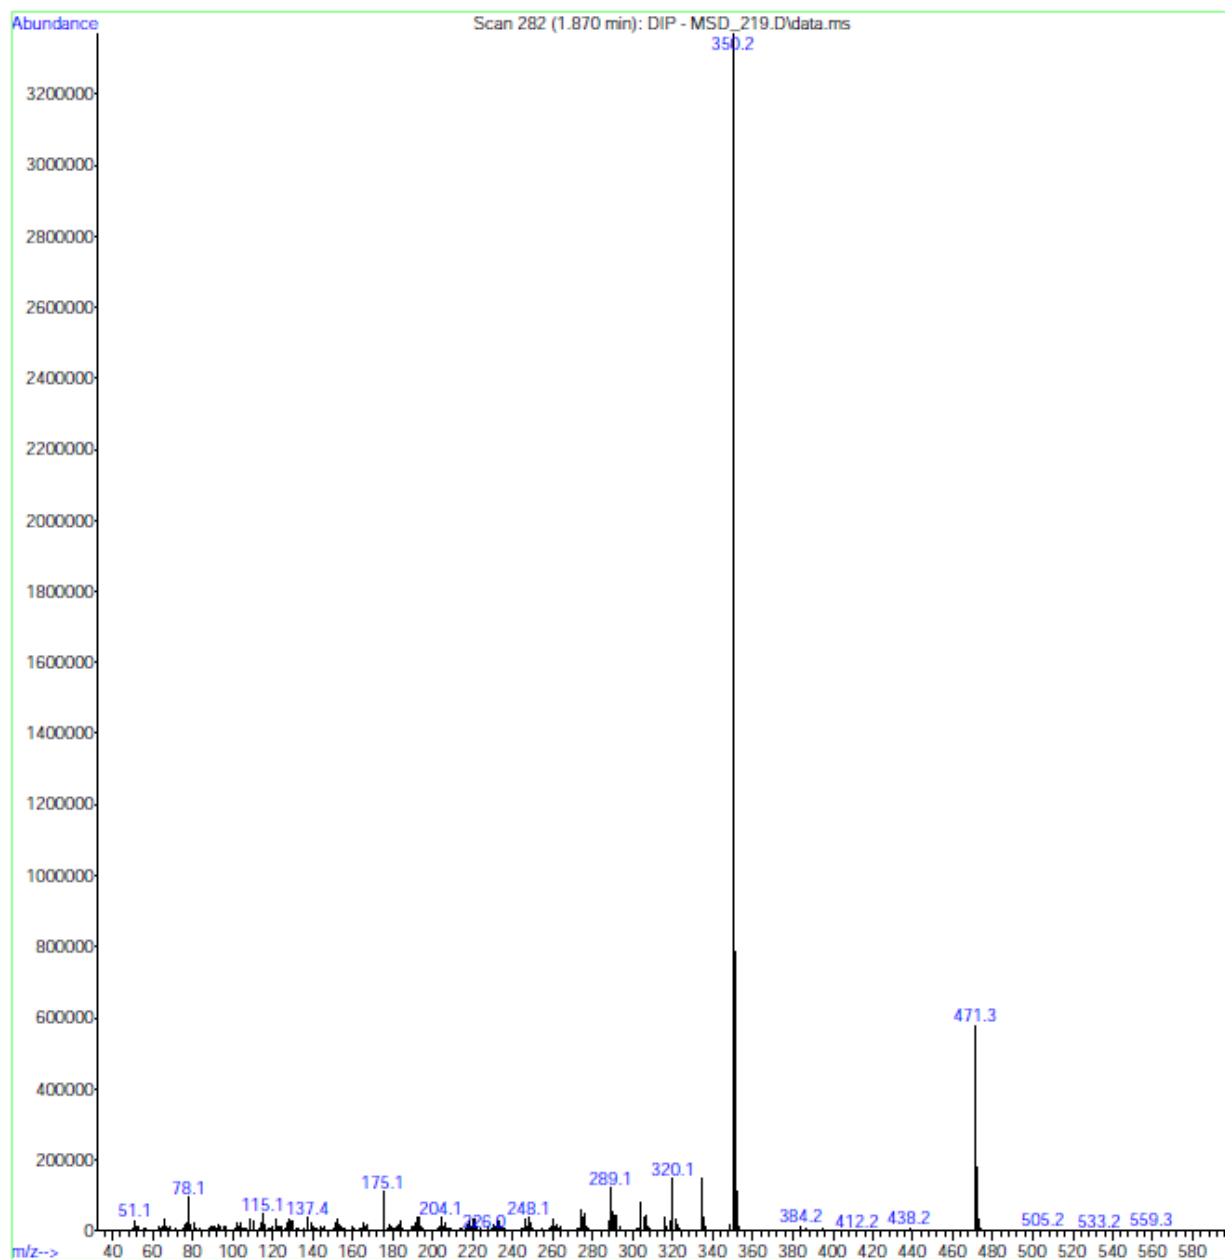

Figure.S6 -Mass spectrum of 2-(2-methyl-5-phenyl-1-(3,4,5-trimethoxyphenyl)-1H-pyrrol-3-yl)-2-oxo-N-(pyridin-4-yl) acetamide. **Compound (4)**



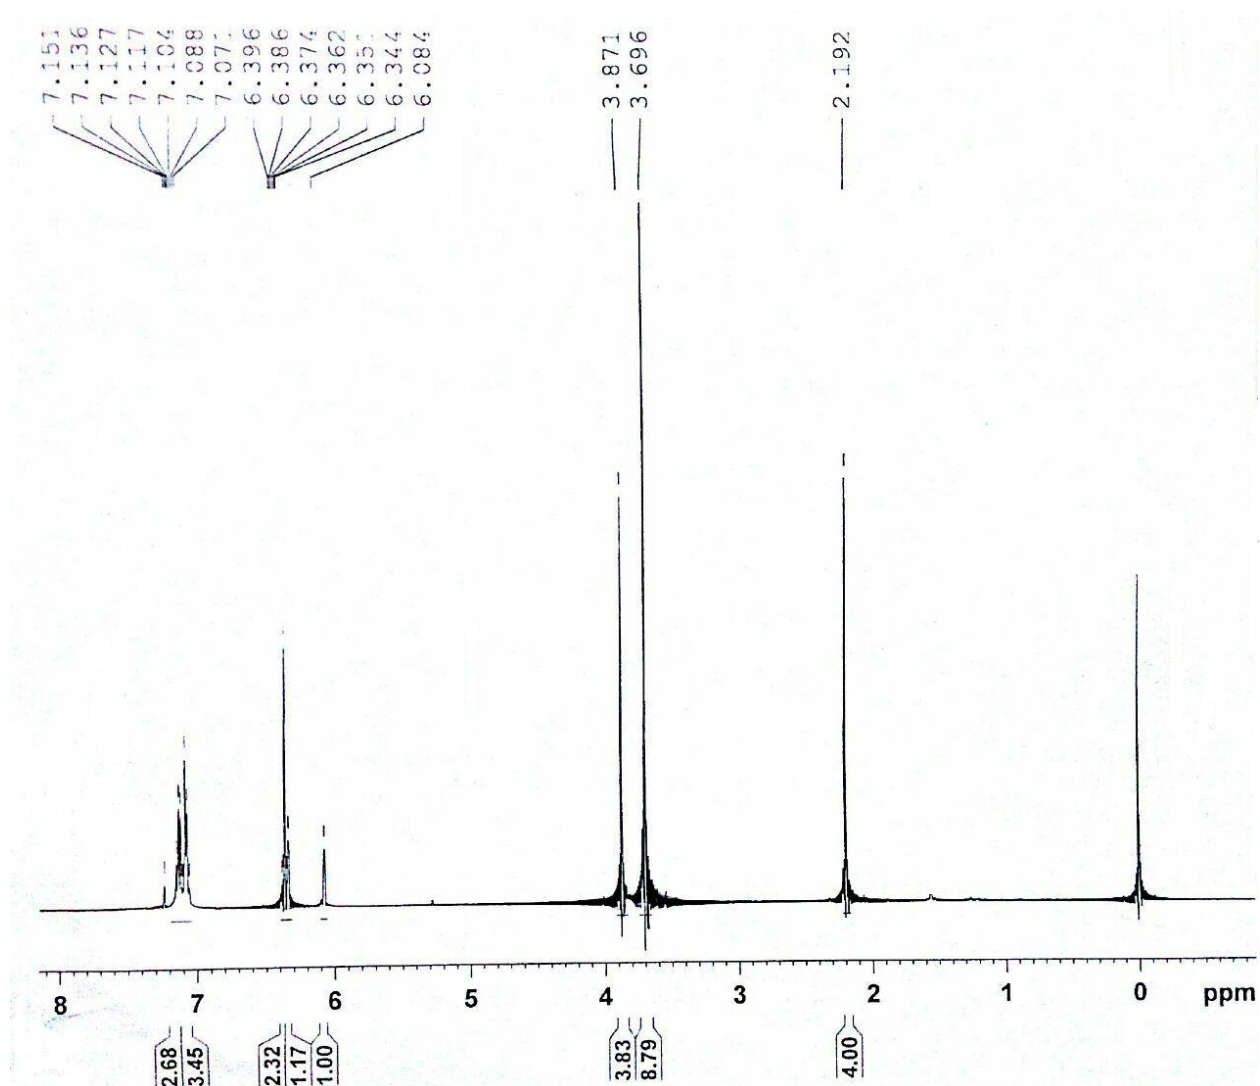

Figure.S7: <sup>1</sup>H NMR Spectrum of 2-methyl-5-phenyl-1-(3,4,5-trimethoxyphenyl)-1H-pyrrole. **compound (3)**

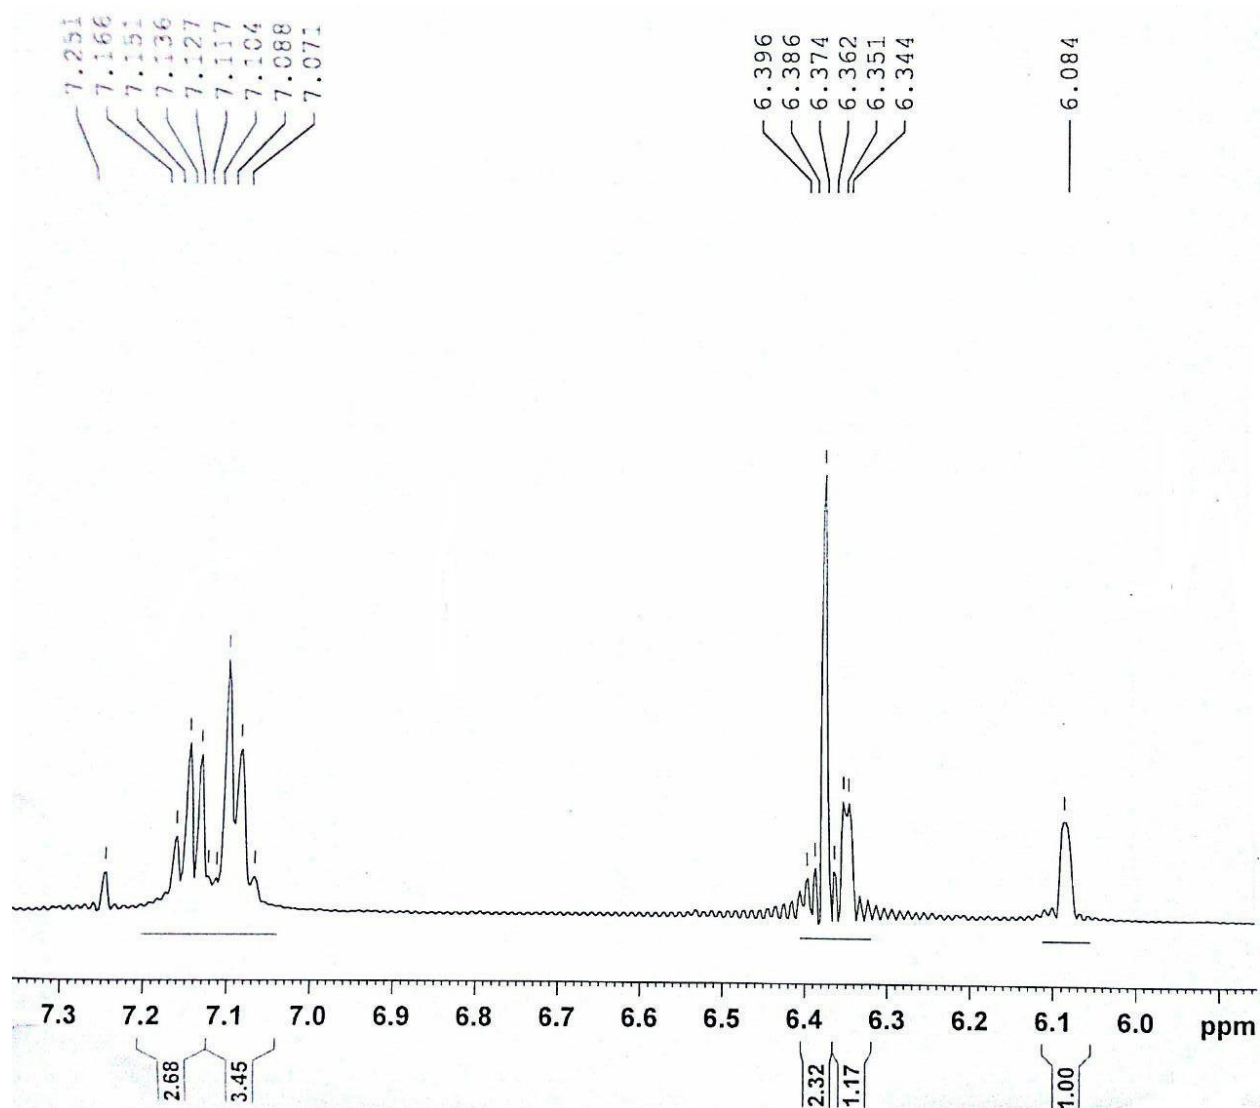

Figure.S8: <sup>1</sup>H NMR Spectrum of 2-methyl-5-phenyl-1-(3,4,5-trimethoxyphenyl)-1H-pyrrole.  
**compound (3) - Expanded**

Ebi-34-C

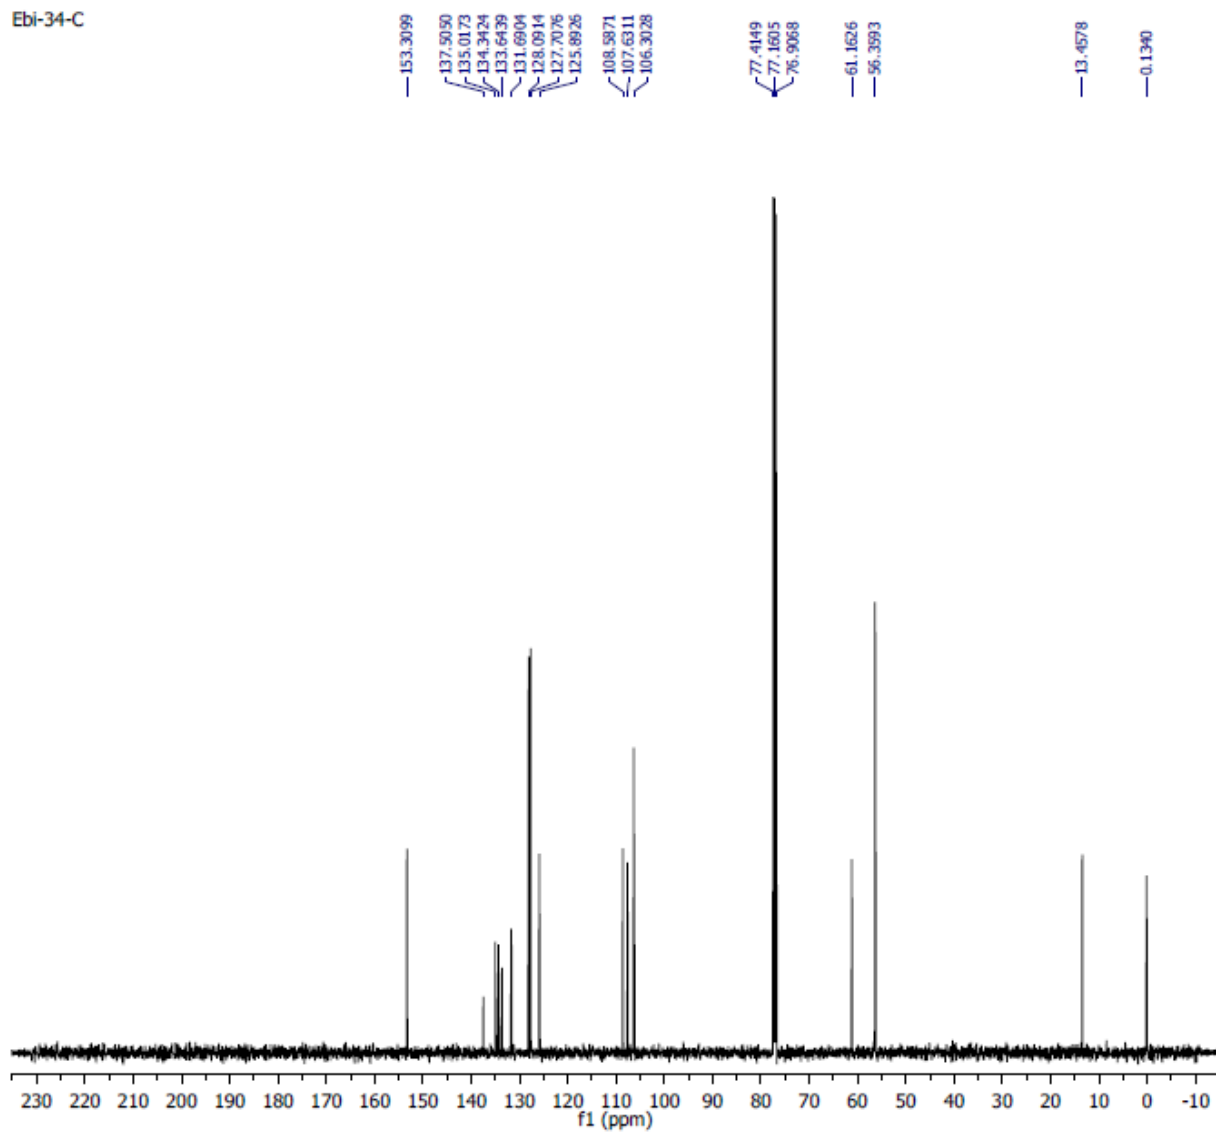

Figure.S9: <sup>13</sup>CNMR Spectrum of 2-methyl-5-phenyl-1-(3,4,5-trimethoxyphenyl)-1H-pyrrole. compound (3)

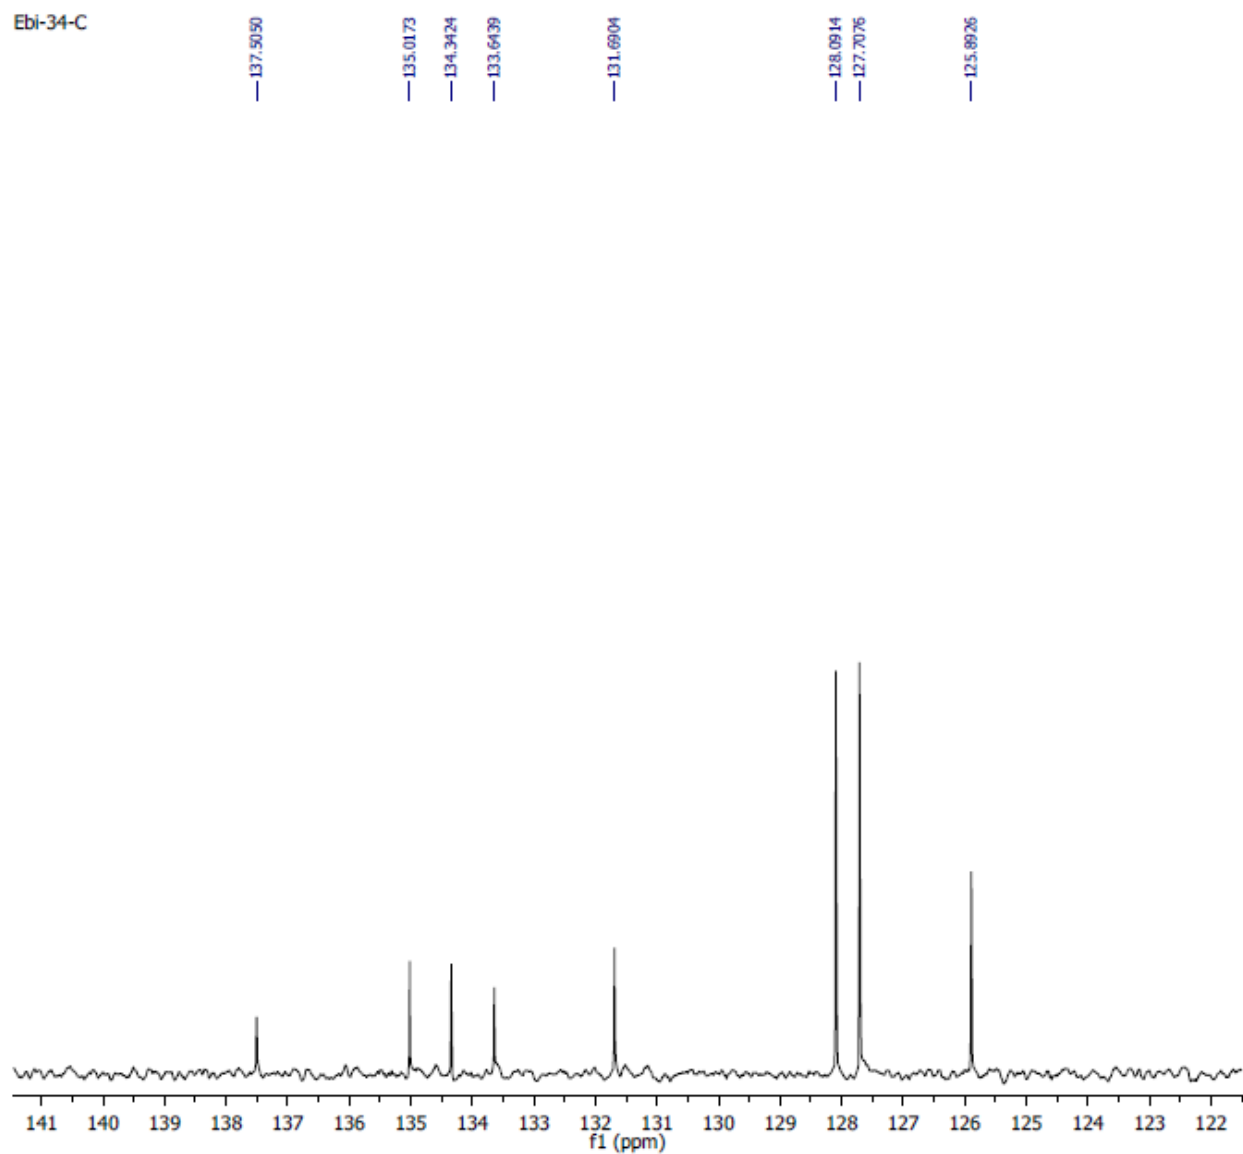

Figure.S10:  $^{13}\text{C}$ NMR Spectrum of 2-methyl-5-phenyl-1-(3,4,5-trimethoxyphenyl)-1H-pyrrole.  
**compound (3) – Expanded**

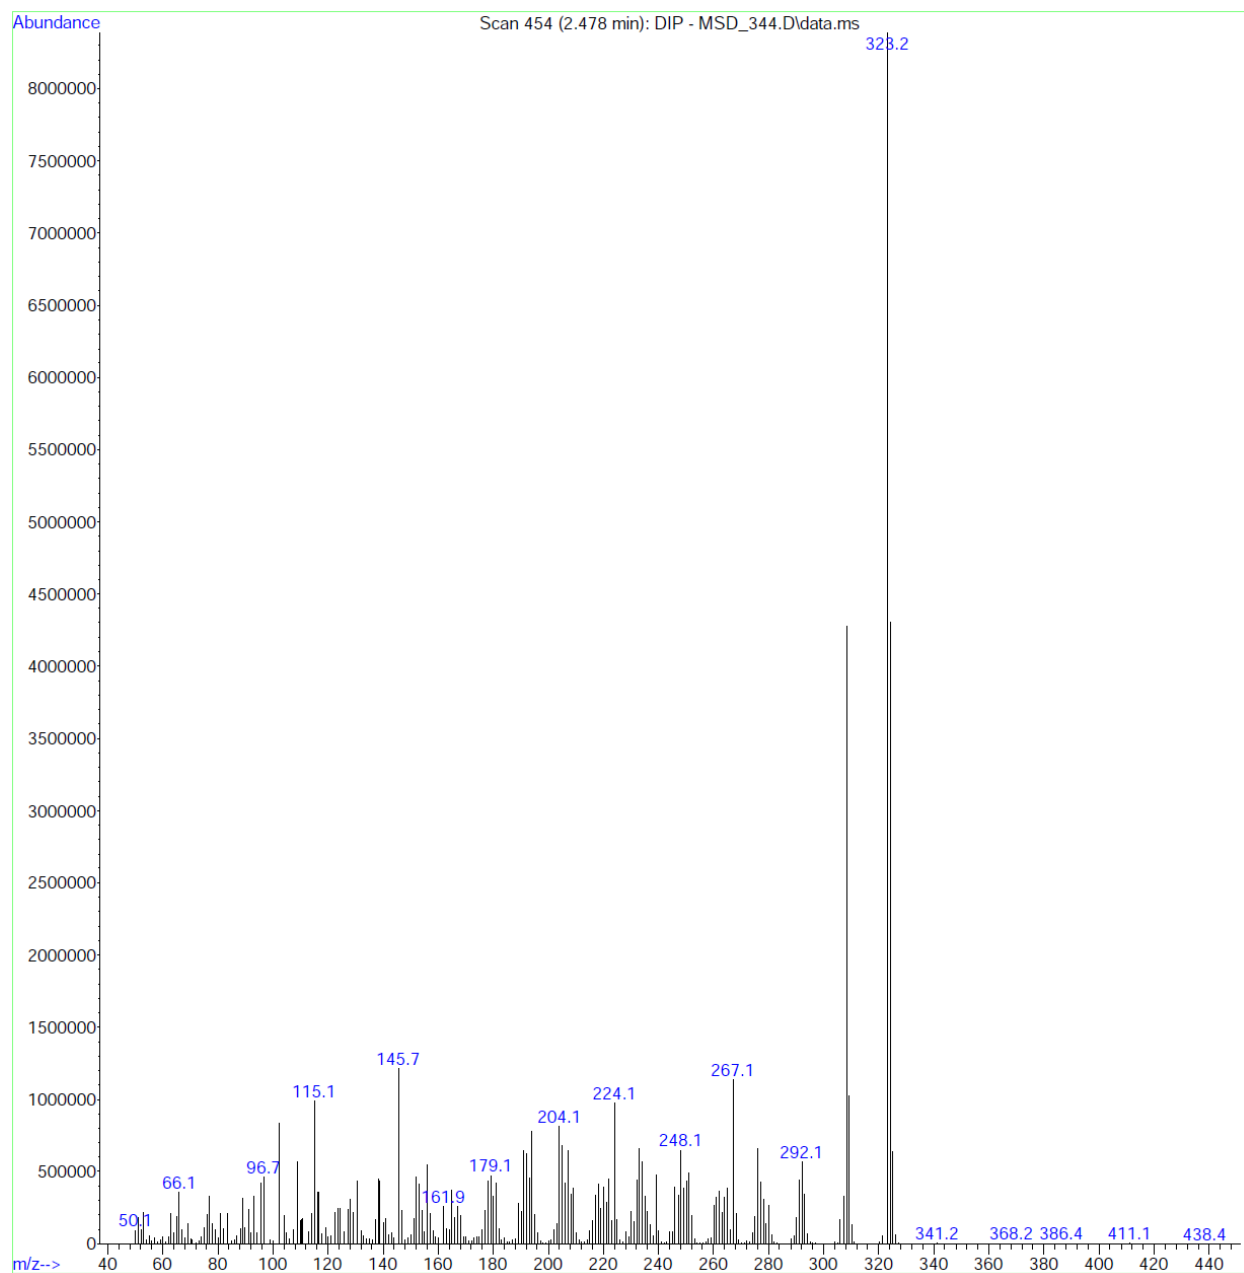

Figure.S11: Mass Spectrum of 2-methyl-5-phenyl-1-(3,4,5-trimethoxyphenyl)-1H-pyrrole.  
**compound (3)**
