# Supplementary material
Source: MDPI journal article supplement (https://www.mdpi.com/1422-8599/2018/3/1002)
Supplement: s2 [file s2]

InChI=1S/C20H21NO3/c1-14-10-11-17(15-8-6-5-7-9-15)21(14)16-12-18(22-2)20(24-4)19(13-16)23-3/h5-13H,1-4H3
AuxInfo=1/0/N:12,20,24,22,3,2,4,1,5,10,11,14,18,9,6,13,7,15,17,16,8,19,23,21/E:(2,3)(6,7)(8,9)(12,13)(18,19)(22,23)/rA:24CCCCCCCNCCCCCCCCCCOCOCOC/rB:d1;s2;d3;s4;s1d5;s6;s7;s8;d9;d7s10;s9;s8;d13;s14;d15;s16;s13d17;s15;s19;s16;s21;s17;s23;/rC:-5.06,.495,0;-6.3937,-.275,0;-6.3937,-1.815,0;-5.06,-2.585,0;-3.7263,-1.815,0;-3.7263,-.275,0;-2.3926,.495,0;-.9858,-.1313,0;.0446,1.013,0;-.7254,2.3467,0;-2.2316,2.0266,0;1.5762,.852,0;-.6656,-1.6377,0;-1.81,-2.6682,0;-1.4898,-4.1746,0;-.0252,-4.6504,0;1.1192,-3.62,0;.799,-2.1136,0;-2.6343,-5.205,0;-2.3141,-6.7114,0;.295,-6.1568,0;1.7596,-6.6327,0;2.5839,-4.0958,0;3.7283,-3.0654,0;
