# Supplementary material
Source: MDPI journal article supplement (https://www.mdpi.com/1422-8599/2018/3/1002)
Supplement: s3 [file s3]

  Mrv0541 06081820263D          

 24 26  0  0  0  0            999 V2000
   -5.0600    0.4950    0.0000 C   0  0  0  0  0  0  0  0  0  0  0  0
   -6.3937   -0.2750    0.0000 C   0  0  0  0  0  0  0  0  0  0  0  0
   -6.3937   -1.8150    0.0000 C   0  0  0  0  0  0  0  0  0  0  0  0
   -5.0600   -2.5850    0.0000 C   0  0  0  0  0  0  0  0  0  0  0  0
   -3.7263   -1.8150    0.0000 C   0  0  0  0  0  0  0  0  0  0  0  0
   -3.7263   -0.2750    0.0000 C   0  0  0  0  0  0  0  0  0  0  0  0
   -2.3926    0.4950    0.0000 C   0  0  0  0  0  0  0  0  0  0  0  0
   -0.9858   -0.1313    0.0000 N   0  0  0  0  0  0  0  0  0  0  0  0
    0.0446    1.0130    0.0000 C   0  0  0  0  0  0  0  0  0  0  0  0
   -0.7254    2.3467    0.0000 C   0  0  0  0  0  0  0  0  0  0  0  0
   -2.2316    2.0266    0.0000 C   0  0  0  0  0  0  0  0  0  0  0  0
    1.5762    0.8520    0.0000 C   0  0  0  0  0  0  0  0  0  0  0  0
   -0.6656   -1.6377    0.0000 C   0  0  0  0  0  0  0  0  0  0  0  0
   -1.8100   -2.6682    0.0000 C   0  0  0  0  0  0  0  0  0  0  0  0
   -1.4898   -4.1746    0.0000 C   0  0  0  0  0  0  0  0  0  0  0  0
   -0.0252   -4.6504    0.0000 C   0  0  0  0  0  0  0  0  0  0  0  0
    1.1192   -3.6200    0.0000 C   0  0  0  0  0  0  0  0  0  0  0  0
    0.7990   -2.1136    0.0000 C   0  0  0  0  0  0  0  0  0  0  0  0
   -2.6343   -5.2050    0.0000 O   0  0  0  0  0  0  0  0  0  0  0  0
   -2.3141   -6.7114    0.0000 C   0  0  0  0  0  0  0  0  0  0  0  0
    0.2950   -6.1568    0.0000 O   0  0  0  0  0  0  0  0  0  0  0  0
    1.7596   -6.6327    0.0000 C   0  0  0  0  0  0  0  0  0  0  0  0
    2.5839   -4.0958    0.0000 O   0  0  0  0  0  0  0  0  0  0  0  0
    3.7283   -3.0654    0.0000 C   0  0  0  0  0  0  0  0  0  0  0  0
  1  2  2  0  0  0  0
  1  6  1  0  0  0  0
  2  3  1  0  0  0  0
  3  4  2  0  0  0  0
  4  5  1  0  0  0  0
  5  6  2  0  0  0  0
  6  7  1  0  0  0  0
  8  9  1  0  0  0  0
  9 10  2  0  0  0  0
 10 11  1  0  0  0  0
  7  8  1  0  0  0  0
  7 11  2  0  0  0  0
  9 12  1  0  0  0  0
  8 13  1  0  0  0  0
 14 15  1  0  0  0  0
 15 16  2  0  0  0  0
 16 17  1  0  0  0  0
 17 18  2  0  0  0  0
 13 14  2  0  0  0  0
 13 18  1  0  0  0  0
 15 19  1  0  0  0  0
 19 20  1  0  0  0  0
 16 21  1  0  0  0  0
 21 22  1  0  0  0  0
 17 23  1  0  0  0  0
 23 24  1  0  0  0  0
M  END
