# Supplementary material
Source: MDPI journal article supplement (https://www.mdpi.com/1422-8599/2018/3/1002)
Supplement: s4 [file s4]

InChI=1S/C27H25N3O5/c1-17-21(25(31)27(32)29-19-10-12-28-13-11-19)16-22(18-8-6-5-7-9-18)30(17)20-14-23(33-2)26(35-4)24(15-20)34-3/h5-16H,1-4H3,(H,28,29,32)
AuxInfo=1/1/N:8,33,35,34,17,16,18,15,19,25,29,26,28,20,24,2,5,6,14,7,1,3,21,23,9,22,10,27,12,4,11,13,31,32,30/E:(2,3)(6,7)(8,9)(10,11)(12,13)(14,15)(23,24)(33,34)/rA:35CCCNCCCCCCONOCCCCCCCCCCCCCNCCOOOCCC/rB:s1;d2;s3;d1s4;s3;s4;s5;s1;s9;d9;s10;d10;s12;d6;s15;d16;s17;s6d18;d7;s20;d21;s22;s7d23;d14;s25;d26;s27;s14d28;s22;s21;s23;s31;s30;s32;/rC:-.8799,2.685,0;-2.1259,1.7799,0;-1.6499,.3153,0;-.1099,.3153,0;.3659,1.7799,0;-2.5553,-.9307,0;.7952,-.9307,0;1.8305,2.2557,0;-.8799,4.225,0;.4536,4.995,0;-2.2137,4.995,0;.4536,6.535,0;1.7873,4.225,0;1.7873,7.305,0;-4.0867,-.7696,0;-4.992,-2.0156,0;-4.3656,-3.4225,0;-2.834,-3.5834,0;-1.9288,-2.3374,0;.1687,-2.3374,0;1.0741,-3.5834,0;2.6057,-3.4225,0;3.2319,-2.0156,0;2.3268,-.7696,0;3.1211,6.535,0;4.4548,7.305,0;4.4548,8.845,0;3.1211,9.615,0;1.7873,8.845,0;3.5108,-4.6683,0;.4476,-4.9903,0;4.7635,-1.8547,0;1.3528,-6.2362,0;5.0424,-4.5074,0;5.3898,-.4478,0;
