# Supplementary material
Source: MDPI journal article supplement (https://www.mdpi.com/1422-8599/2018/3/1002)
Supplement: s5 [file s5]

  Mrv0541 02031800032D          

 35 38  0  0  0  0            999 V2000
   -0.4714    1.4384    0.0000 C   0  0  0  0  0  0  0  0  0  0  0  0
   -1.1389    0.9535    0.0000 C   0  0  0  0  0  0  0  0  0  0  0  0
   -0.8839    0.1689    0.0000 C   0  0  0  0  0  0  0  0  0  0  0  0
   -0.0589    0.1689    0.0000 N   0  0  0  0  0  0  0  0  0  0  0  0
    0.1960    0.9535    0.0000 C   0  0  0  0  0  0  0  0  0  0  0  0
   -1.3689   -0.4986    0.0000 C   0  0  0  0  0  0  0  0  0  0  0  0
    0.4260   -0.4986    0.0000 C   0  0  0  0  0  0  0  0  0  0  0  0
    0.9806    1.2084    0.0000 C   0  0  0  0  0  0  0  0  0  0  0  0
   -0.4714    2.2634    0.0000 C   0  0  0  0  0  0  0  0  0  0  0  0
    0.2430    2.6759    0.0000 C   0  0  0  0  0  0  0  0  0  0  0  0
   -1.1859    2.6759    0.0000 O   0  0  0  0  0  0  0  0  0  0  0  0
    0.2430    3.5009    0.0000 N   0  0  0  0  0  0  0  0  0  0  0  0
    0.9575    2.2634    0.0000 O   0  0  0  0  0  0  0  0  0  0  0  0
    0.9575    3.9134    0.0000 C   0  0  0  0  0  0  0  0  0  0  0  0
   -2.1893   -0.4123    0.0000 C   0  0  0  0  0  0  0  0  0  0  0  0
   -2.6743   -1.0798    0.0000 C   0  0  0  0  0  0  0  0  0  0  0  0
   -2.3387   -1.8335    0.0000 C   0  0  0  0  0  0  0  0  0  0  0  0
   -1.5182   -1.9197    0.0000 C   0  0  0  0  0  0  0  0  0  0  0  0
   -1.0333   -1.2522    0.0000 C   0  0  0  0  0  0  0  0  0  0  0  0
    0.0904   -1.2522    0.0000 C   0  0  0  0  0  0  0  0  0  0  0  0
    0.5754   -1.9197    0.0000 C   0  0  0  0  0  0  0  0  0  0  0  0
    1.3959   -1.8335    0.0000 C   0  0  0  0  0  0  0  0  0  0  0  0
    1.7314   -1.0798    0.0000 C   0  0  0  0  0  0  0  0  0  0  0  0
    1.2465   -0.4123    0.0000 C   0  0  0  0  0  0  0  0  0  0  0  0
    1.6720    3.5009    0.0000 C   0  0  0  0  0  0  0  0  0  0  0  0
    2.3865    3.9134    0.0000 C   0  0  0  0  0  0  0  0  0  0  0  0
    2.3865    4.7384    0.0000 N   0  0  0  0  0  0  0  0  0  0  0  0
    1.6720    5.1509    0.0000 C   0  0  0  0  0  0  0  0  0  0  0  0
    0.9575    4.7384    0.0000 C   0  0  0  0  0  0  0  0  0  0  0  0
    1.8808   -2.5009    0.0000 O   0  0  0  0  0  0  0  0  0  0  0  0
    0.2398   -2.6734    0.0000 O   0  0  0  0  0  0  0  0  0  0  0  0
    2.5519   -0.9936    0.0000 O   0  0  0  0  0  0  0  0  0  0  0  0
    0.7247   -3.3408    0.0000 C   0  0  0  0  0  0  0  0  0  0  0  0
    2.7013   -2.4147    0.0000 C   0  0  0  0  0  0  0  0  0  0  0  0
    2.8874   -0.2399    0.0000 C   0  0  0  0  0  0  0  0  0  0  0  0
  1  2  1  0  0  0  0
  1  5  2  0  0  0  0
  2  3  2  0  0  0  0
  3  4  1  0  0  0  0
  4  5  1  0  0  0  0
  3  6  1  0  0  0  0
  4  7  1  0  0  0  0
  5  8  1  0  0  0  0
  1  9  1  0  0  0  0
  9 10  1  0  0  0  0
  9 11  2  0  0  0  0
 10 12  1  0  0  0  0
 10 13  2  0  0  0  0
 12 14  1  0  0  0  0
 15 16  1  0  0  0  0
 16 17  2  0  0  0  0
 17 18  1  0  0  0  0
 18 19  2  0  0  0  0
  6 15  2  0  0  0  0
  6 19  1  0  0  0  0
 20 21  1  0  0  0  0
 21 22  2  0  0  0  0
 22 23  1  0  0  0  0
 23 24  2  0  0  0  0
  7 20  2  0  0  0  0
  7 24  1  0  0  0  0
 25 26  1  0  0  0  0
 26 27  2  0  0  0  0
 27 28  1  0  0  0  0
 28 29  2  0  0  0  0
 14 25  2  0  0  0  0
 14 29  1  0  0  0  0
 22 30  1  0  0  0  0
 21 31  1  0  0  0  0
 23 32  1  0  0  0  0
 31 33  1  0  0  0  0
 30 34  1  0  0  0  0
 32 35  1  0  0  0  0
M  END
